# Supplementary material
Source: PubMed Central journal article supplement (PMC8247115)
Supplement: NIHMS1569100-supplement-8.pdf [file NIHMS1569100-supplement-8.pdf]

**Table S1.** Data collection, model refinement and validation. **Related to Figure 1.**

| <b>Data collection and processing</b>               |           |
|-----------------------------------------------------|-----------|
| Magnification                                       | 130,000   |
| Voltage (kV)                                        | 300       |
| Electron exposure (e <sup>-</sup> /Å <sup>2</sup> ) | ~83       |
| Defocus range (μm)                                  | -1.0~-2.5 |
| Pixel size (Å)                                      | 1.029     |
| Symmetry imposed                                    | C1        |
| Initial particle images (no.)                       | 1,590,810 |
| Final particle images (no.)                         | 721,844   |
| Map resolution (Å)                                  | 3.20      |
| FSC threshold                                       | 0.143     |
| <b>Refinement</b>                                   |           |
| Initial model used (code)                           | 6DDE      |
| Model resolution (Å)                                | 3.20      |
| FSC threshold                                       | 0.143     |
| Model resolution range (Å)                          | 40-3.2    |
| Map sharpening <i>B</i> factor (Å <sup>2</sup> )    | -180      |
| Model composition                                   |           |
| Non-hydrogen atoms                                  | 10235     |
| Protein residues                                    | 1284      |
| Ligands                                             | 9         |
| B factors (Å <sup>2</sup> )                         |           |
| Protein                                             | 122.5     |
| Ligand                                              | 150.4     |
| R.m.s. deviations                                   |           |
| Bond lengths (Å)                                    | 0.004     |
| Bond angles (°)                                     | 0.882     |
| Validation                                          |           |
| MolProbity score                                    | 1.41      |
| Clashscore                                          | 4.98      |
| Ramachandran plot                                   |           |
| Favored (%)                                         | 97.3      |
| Allowed (%)                                         | 2.7       |
| Disallowed (%)                                      | 0         |
